# Supplementary material for: Identification and characterization of a novel DGAT1 missense mutation associated with congenital diarrhea
Source: PubMed Central journal article supplement (PMC5454518; doi:10.1194/jlr.p075119), 2017-04-03
Supplement: 10.1194_P075119_jlr.P075119-1.pdf [file 10.1194_P075119_jlr.P075119-1.pdf]

## **Supplemental Information**

### **Identification and characterization of a novel *DGAT1* missense mutation associated with congenital diarrhea**

Nina L. Gluchowski<sup>1,2,3</sup>, Chandramohan Chitraju<sup>2</sup>, Joseph A. Picoraro<sup>4</sup>, Niklas Mejhert<sup>2</sup>, Shirly Pinto<sup>5</sup>, Winnie Xin<sup>3,6</sup>, Daniel S. Kamin<sup>1,3</sup>, Harland S. Winter<sup>3,7</sup>, Wendy K. Chung<sup>8</sup>, Tobias C. Walther<sup>2,3,9,10,\*</sup> and Robert V. Farese Jr.<sup>2,3,9,\*</sup>

Division of Gastroenterology and Nutrition, Boston Children's Hospital, Boston MA 02115<sup>1</sup>; Department of Genetics and Complex Diseases, Harvard T.H. Chan School of Public Health, Boston, MA 02115<sup>2</sup>; Harvard Medical School, Boston MA 02115<sup>3</sup>; Division of Pediatric Gastroenterology, Hepatology and Nutrition, Columbia University Medical Center, New York, NY 10027<sup>4</sup>; Merck & Co., Inc., Kenilworth, NJ 07033<sup>5</sup>; Department of Neurology, Massachusetts General Hospital, Boston, MA 02114<sup>6</sup>; Division of Gastroenterology, MassGeneral Hospital for Children, Boston, MA 02114<sup>7</sup>; Departments of Pediatrics and Medicine, Columbia University Medical Center, New York, NY 10027<sup>8</sup>; Broad Institute of Harvard and MIT, Cambridge, MA 02142<sup>9</sup>; and Howard Hughes Medical Institute, Boston, MA 02115<sup>10</sup>

Supplemental Figure S1

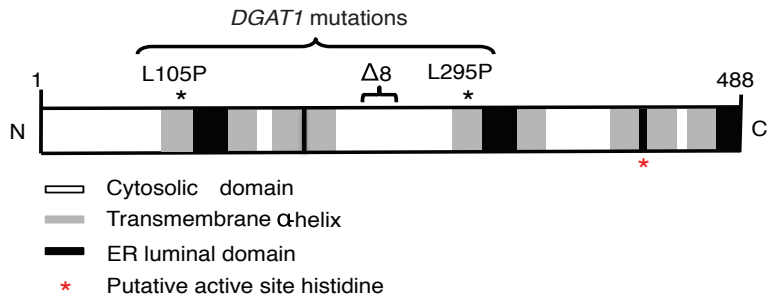

**Supplemental Fig. S1.** Schematic model of the DGAT1 protein showing nine predicted transmembrane domains, a histidine required for activity, and the location of amino acid changes due to the three human *DGAT1* mutations. Adapted from adapted from TMHMM Server v. 2.0 and McFie et al 2010.  $\Delta 8$ : chromosome 8 145541756 A->G.
